# Supplementary material
Source: Springer Nature journal article supplement (https://www.springermedizin.de/resource/supplementary/12936_2007_399_MOESM1_ESM.pdf/9547724)
Supplement: MOESM1 [file 9547724]

Children with fever onset in past 14 days, but no fever on the day of the study:

N = 334

Children with fever onset in past 14 days *and* fever on the day of the study:

N = 192

Children with fever onset on the day of the study:

N = 3

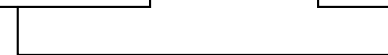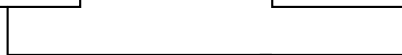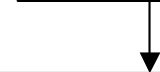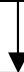

*Case-management study:*  
Fever onset in the past 14 days  
N = 526

*Study to develop a symptom-based malaria case definition:*  
Fever on the day of the study  
N = 195

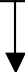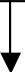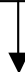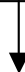

Probable malaria cases:  
N = 165 (31.4%)  
(denominator for coverage estimate)

Probably not malaria cases:  
N = 361 (68.6%)

True positive malaria cases:  
N = 92 (47.2%)

True negative malaria cases:  
N = 103 (52.8%)
